# Supplementary material
Source: PubMed Central journal article supplement (PMC11459645)
Supplement: mmc1.pdf [file mmc1.pdf]

| Desempenho dos Membros Superiores - Módulo para DMD (PUL 2.0)                                                                                                                          |                 |                                       |                                                                                                         |                                                                                            |                                                                     |                                                                                                                                          |                                                                                                                                                                |                                                                                                            |
|----------------------------------------------------------------------------------------------------------------------------------------------------------------------------------------|-----------------|---------------------------------------|---------------------------------------------------------------------------------------------------------|--------------------------------------------------------------------------------------------|---------------------------------------------------------------------|------------------------------------------------------------------------------------------------------------------------------------------|----------------------------------------------------------------------------------------------------------------------------------------------------------------|------------------------------------------------------------------------------------------------------------|
| Braço de preferência (usado em todos os testes): <input type="checkbox"/> Direito <input type="checkbox"/> Esquerdo                                                                    |                 |                                       |                                                                                                         |                                                                                            |                                                                     |                                                                                                                                          |                                                                                                                                                                |                                                                                                            |
| ADM de Extensão do Cotovelo: <input type="checkbox"/> Direito: p.ex.: Completa = 0°<br><input type="checkbox"/> Esquerdo: 10° Contratura = -10°                                        |                 |                                       |                                                                                                         |                                                                                            |                                                                     |                                                                                                                                          |                                                                                                                                                                |                                                                                                            |
| ADM de Supinação                                                                                                                                                                       |                 | Direito:                              |                                                                                                         |                                                                                            |                                                                     | Esquerdo:                                                                                                                                |                                                                                                                                                                |                                                                                                            |
|                                                                                                                                                                                        |                 | <input type="checkbox"/> Completa     |                                                                                                         | <input type="checkbox"/> ½                                                                 |                                                                     | <input type="checkbox"/> Completa                                                                                                        |                                                                                                                                                                | <input type="checkbox"/> ½                                                                                 |
|                                                                                                                                                                                        |                 | <input type="checkbox"/> ¾            |                                                                                                         | <input type="checkbox"/> ¼                                                                 |                                                                     | <input type="checkbox"/> ¾                                                                                                               |                                                                                                                                                                | <input type="checkbox"/> ¼                                                                                 |
| Item de entrada A. - comece com A para identificar o ponto de partida para os testes subsequentes. Circule a pontuação de cada item. NÃO INCLUIR NA PONTUAÇÃO TOTAL Descrição de Item. |                 |                                       |                                                                                                         |                                                                                            |                                                                     |                                                                                                                                          |                                                                                                                                                                |                                                                                                            |
| Item                                                                                                                                                                                   | Descrição       | 0                                     | 1                                                                                                       | 2                                                                                          | 3                                                                   | 4                                                                                                                                        | 5                                                                                                                                                              | 6                                                                                                          |
| A.                                                                                                                                                                                     | Item de entrada | Não apresenta funcionalidade das mãos | Pode usar as mãos para segurar uma caneta ou pegar uma moeda ou dirigir uma cadeira de rodas motorizada | Pode levantar 1 ou 2 mãos à boca, mas não pode levantar um copo com um peso de 200g à boca | Pode levantar um copo com um peso de 200g à boca usando 1 ou 2 mãos | Pode elevar simultaneamente os dois braços até a altura dos ombros (com ou sem compensação, isto é, com o cotovelo fletido ou estendido) | Pode elevar simultaneamente os dois braços acima da cabeça apenas flexionando o cotovelo (diminuindo a circunferência do movimento/usando músculos acessórios) | Pode abduzir simultaneamente os dois braços em extensão em um círculo completo até tocarem acima da cabeça |
| Para item A: Pontuação de 3, 4, 5, 6 no item A, comece com o item 1 – nessa página<br>Pontuação de 1 ou 2, comece com o item 7 na página 2.                                            |                 |                                       |                                                                                                         |                                                                                            |                                                                     |                                                                                                                                          |                                                                                                                                                                |                                                                                                            |

| Nível Superior – Dimensão do Ombro      |                                                                                                                          |         |                                                                                                                   |                                                                                                                          |           |
|-----------------------------------------|--------------------------------------------------------------------------------------------------------------------------|---------|-------------------------------------------------------------------------------------------------------------------|--------------------------------------------------------------------------------------------------------------------------|-----------|
| Item                                    | Descrição                                                                                                                | 0       | 1                                                                                                                 | 2                                                                                                                        | Pontuação |
| 1<br>Pontuação do item de entrada acima | Abduzir os dois braços acima da cabeça: "Eleve os braços e tente manter os cotovelos estendidos"                         | Incapaz | Pode elevar os dois braços simultaneamente acima da cabeça apenas flexionando o cotovelo (com compensação)        | Pode abduzir simultaneamente os dois braços em extensão em um círculo completo até tocarem acima da cabeça               |           |
| 2                                       | Elevar os dois braços até a altura dos ombros (cotovelos na altura dos ombros): "Eleve os braços até o nível dos ombros" | Incapaz | Pode elevar os dois braços até a altura dos ombros, um de cada vez ou com os cotovelos fletidos (com compensação) | Pode elevar os dois braços até a altura dos ombros sem compensação, ou seja, simultaneamente com os cotovelos estendidos |           |
| 3                                       | Flexionar o braço até a altura do ombro (sem pesos): "Estenda a mão e toque minha mão"                                   | Incapaz | Capaz com compensação                                                                                             | Capaz sem compensação                                                                                                    |           |
| 4                                       | Flexionar o braço até a altura do ombro segurando um peso de 500g: "Estenda a mão como se fosse tocar a minha mão"       | Incapaz | Capaz de levantar um peso de 500g com compensação                                                                 | Capaz de levantar um peso de 500g sem compensação                                                                        |           |

| Dimensão de ombro de alto nível (continuação) |                                                                                                     |         |                                                          |                                                          |           |
|-----------------------------------------------|-----------------------------------------------------------------------------------------------------|---------|----------------------------------------------------------|----------------------------------------------------------|-----------|
| Item                                          | Descrição                                                                                           | 0       | 1                                                        | 2                                                        | Pontuação |
| 5                                             | Flexionar o braço acima da altura do ombro segurando um peso de 500g: "Mão no colo - "me dê o peso" | Incapaz | Capaz de levantar um peso de 500g <b>com compensação</b> | Capaz de levantar um peso de 500g <b>sem compensação</b> |           |
| 6                                             | Flexionar o braço acima do ombro segurando um peso de 1 kg. Mão no colo: "me dê o peso"             | Incapaz | Capaz de levantar um peso de 1kg <b>com compensação</b>  | Capaz de levantar um peso de 1kg <b>sem compensação</b>  |           |

| Nível Médio – Dimensão do Cotovelo – Faça esses testes em todos os indivíduos |                                                                                                                                             |         |                                                                                                                                                     |                                                                                                        |           |
|-------------------------------------------------------------------------------|---------------------------------------------------------------------------------------------------------------------------------------------|---------|-----------------------------------------------------------------------------------------------------------------------------------------------------|--------------------------------------------------------------------------------------------------------|-----------|
| Item                                                                          | Descrição                                                                                                                                   | 0       | 1                                                                                                                                                   | 2                                                                                                      | Pontuação |
| 7                                                                             | Mover a(s) mão(s) até a boca: "Leve o copo à boca com uma mão"                                                                              | Incapaz | Capaz de trazer a boca um copo com um peso de 200g com qualquer compensação (pode usar mais de uma mão e/ou levar a cabeça às mãos)                 | Capaz de trazer a boca um copo com um peso de 200g com uma mão sem apoio do cotovelo (sem compensação) |           |
| 8                                                                             | Mover as mãos do colo a mesa: "Traga as duas mãos do colo para a mesa"                                                                      | Incapaz | Capaz de levar as duas mãos completamente (até a prega do punho) para a mesa, mas <b>NÃO simultaneamente ou em um único movimento</b>               | Duas mãos completamente na mesa simultaneamente                                                        |           |
| 9                                                                             | Mover o peso à mesa (100g): "Mova o peso do círculo de fora para o círculo do centro"                                                       | Incapaz | Pode mover um peso de <b>100g</b> do círculo de fora para o do centro usando compensação (desliza o antebraço ou o cotovelo faz contato com a mesa) | Pode levantar um peso de <b>100g</b> do círculo de fora para o do centro sem compensação               |           |
| 10                                                                            | Mover o peso à mesa (500g): "Mova o peso do círculo de fora para o círculo do centro"                                                       | Incapaz | Pode mover um peso de <b>500g</b> do círculo de fora para o do centro usando compensação (desliza o antebraço ou o cotovelo faz contato com a mesa) | Pode levantar um peso de <b>500g</b> do círculo de fora para o do centro sem compensação               |           |
| 11                                                                            | Mover o peso à mesa (1kg): "Mova o peso do círculo de fora para o círculo do centro"                                                        | Incapaz | Pode mover um peso de <b>1kg</b> do círculo de fora para o do centro usando compensação (desliza o antebraço ou o cotovelo faz contato com a mesa)  | Pode levantar um peso de <b>1kg</b> do círculo de fora para o do centro sem compensação                |           |
| 12                                                                            | Levantar a lata pesada na diagonal: "Levante a lata deste círculo mais próximo da sua mão até esse círculo mais distante e cruze seu corpo" | Incapaz | Pode mover a lata pesada do círculo mais próximo do corpo com compensação (desliza o antebraço ou o cotovelo faz contato com a mesa)                | Pode levantar uma lata pesada do círculo mais próximo do corpo sem compensação                         |           |

| Nível Médio – Dimensão do Cotovelo (continuação) |                                                                                              |                                                            |                                                   |                                                   |           |
|--------------------------------------------------|----------------------------------------------------------------------------------------------|------------------------------------------------------------|---------------------------------------------------|---------------------------------------------------|-----------|
| Item                                             | Descrição                                                                                    | 0                                                          | 1                                                 | 2                                                 | Pontuação |
| 13                                               | <b>Empilhar três latas:</b><br>“Empilhe essas três latas, uma de cada vez, usando uma mão”   | Incapaz de empilhar a terceira lata, mesmo com compensação | Capaz de empilhar a terceira lata com compensação | Capaz de empilhar a terceira lata sem compensação |           |
| 14                                               | <b>Empilhar cinco latas:</b><br>“Empilhe essas cinco latas, uma de cada vez, usando uma mão” | Incapaz de empilhar a quinta lata, mesmo com compensação   | Capaz de empilhar a quinta lata com compensação   | Capaz de empilhar a quinta lata sem compensação   |           |
| 15                                               | <b>Remover a tampa do recipiente:</b> "Use as mãos para abrir este recipiente"               | Incapaz                                                    | Abre completamente                                |                                                   |           |

| Dimensão Distal – Punho e Mão – Faça esses testes em todos os indivíduos |                                                                                                                          |                                                           |                                                                                                  |                                                                                         |           |
|--------------------------------------------------------------------------|--------------------------------------------------------------------------------------------------------------------------|-----------------------------------------------------------|--------------------------------------------------------------------------------------------------|-----------------------------------------------------------------------------------------|-----------|
|                                                                          |                                                                                                                          | 0                                                         | 1                                                                                                | 2                                                                                       | Pontuação |
| 16                                                                       | <b>Rasgar o papel:</b><br>“Rasgue a folha de papel começando por aqui”                                                   | Incapaz                                                   | Rasga a folha de papel dobrada ao meio começando pela borda dobrada                              | Rasga a folha de papel dobrada em 4, começando pela borda dobrada                       |           |
| 17                                                                       | <b>Traçar o caminho:</b> “Use seu lápis para completar o caminho em um movimento uniforme”                               | Incapaz                                                   | Completa o caminho com compensação - precisa levantar o lápis da folha de papel ou girar o braço | Capaz de completar o caminho <b>sem parar</b> ou levantar a mão da folha de papel       |           |
| 18                                                                       | <b>Pressionar o botão de luz:</b> “Pressione o botão da luz com os dedos de uma mão”                                     | Incapaz                                                   | Capaz de ligar a luz momentaneamente com os dedos de uma mão                                     | Capaz de ligar a luz permanentemente com os dedos de uma mão                            |           |
| 19                                                                       | <b>Supinar:</b> "Pegue a luz e vire a mão"                                                                               | Incapaz                                                   | Pega a luz e vira a mão incompletamente ou usa compensação para vira-la                          | Pega a luz e vira a mão completamente, sem movimentos compensatórios                    |           |
| 20                                                                       | <b>Pegar moedas:</b><br>“Usando uma mão, pegue 6 moedas, uma de cada vez”                                                | Incapaz de pegar uma moeda                                | Pode pegar <b>uma</b> moeda/ficha                                                                | Consegue pegar seis moedas em uma mão                                                   |           |
| 21                                                                       | <b>Colocar o dedo no diagrama numérico</b> (precisão não essencial): "Use um dedo para tocar em cada número no diagrama" | Incapaz de levantar o dedo ou deslizá-lo sobre o diagrama | Capaz de colocar o dedo (deslizar ou levantar) entre pelo menos dois quadrados                   | Capaz de colocar o dedo sucessivamente nos números do diagrama (com ou sem compensação) |           |
| 22                                                                       | <b>Pegar um peso de 10g com pinça polpa-polpa:</b><br>"Pegue esse peso pequeno assim (pelo corpo do peso)"               | Incapaz                                                   | Capaz de segurar e levantar o peso da superfície                                                 |                                                                                         |           |

## Material Adicional

### Item 17: Traçar o caminho

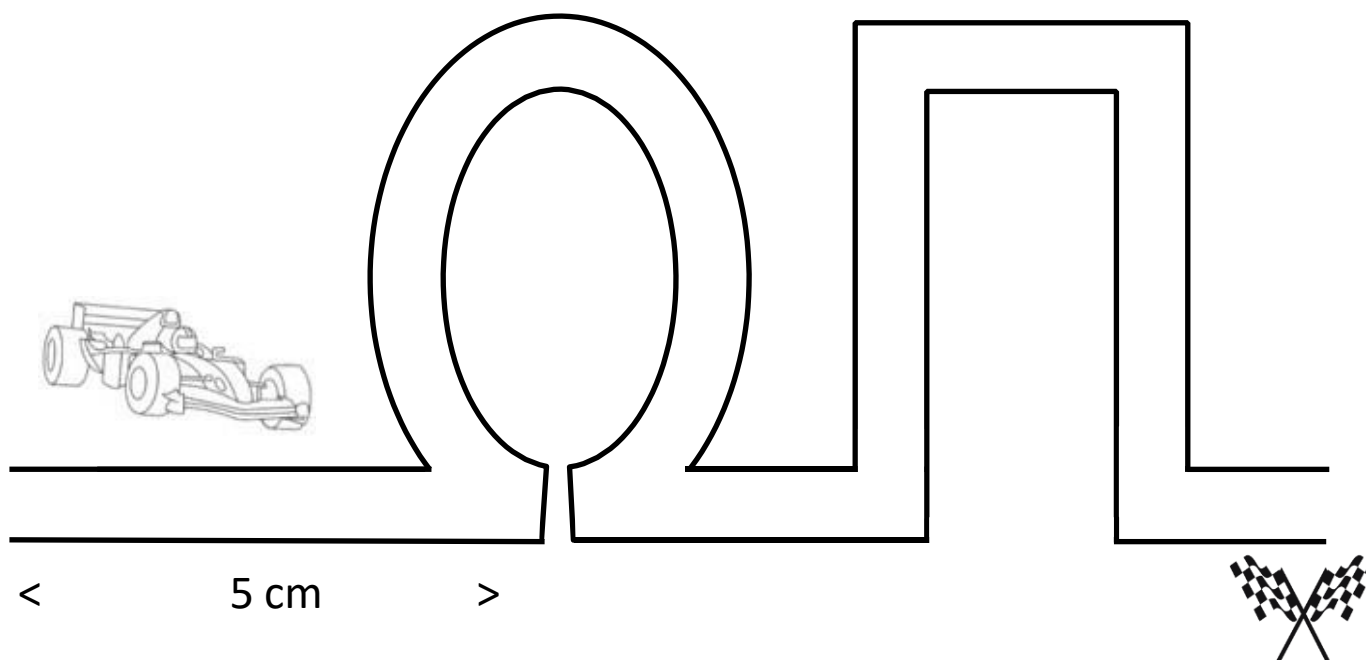

### Item 21: Colocar o dedo no diagrama numérico

Instrução: Começando no número 1 (amarelo), aponte para os números de 1 a 10, em sequência, seguindo a seta.

|   |   |   |    |
|---|---|---|----|
| 1 | 2 | 3 | 4  |
|   |   | 5 |    |
|   | 6 |   |    |
| 7 | 8 | 9 | 10 |

Examinador:

Assinatura do examinador:
